# Supplementary material
Source: Springer Nature journal article supplement (https://www.springermedizin.de/resource/supplementary/12936_2012_2765_MOESM4_ESM.pdf/9545056)

# Bobo-Dioulasso

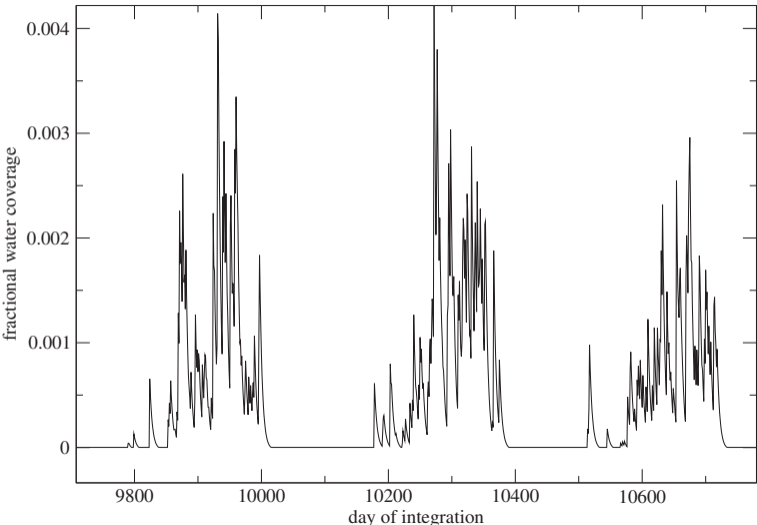

Supplement: MOESM4 [file 9545056]
